# Supplementary material for: The Prevalence of Sarcopenia in Chinese Older Adults: Meta-Analysis and Meta-Regression
Source: MDPI journal article supplement (doi:10.3390/nu13051441), 2021-04-24
Supplement: s1 [file s1]

## Supplementary Materials

### **S1: Search strategy:**

#### **PubMed:**

#1 Search ("Epidemiology"[Mesh]) OR "Prevalence"[Mesh]

#2 Search "Sarcopenia"[Mesh]

#3 Search ("China"[Mesh]) OR Chinese

#4 Search (("Aged"[Mesh]) OR elderly) OR older

#5 #1 AND #2 AND #3 AND #4

#### **Wanfang:**

#1 Ti/KW: (肌肉减少症) or Ti/KW: (肌少症))

#2: All: (老年人) or All: (老年)

#3 All: (患病率) or All:(流行)

#4 All: (中国) or All:(中国人)

#5 #1 AND #2 AND #3 AND #4

Table S2 Critical Appraisal of Study Quality

| Study                   | External validity                   |                                  |                            |                           | Internal validity                     |                          |                       |                                    |                                                   |                                 |              |
|-------------------------|-------------------------------------|----------------------------------|----------------------------|---------------------------|---------------------------------------|--------------------------|-----------------------|------------------------------------|---------------------------------------------------|---------------------------------|--------------|
|                         | Representation of target population | Representation of sampling frame | Random selection of sample | Minimal non-response bias | Data collected directly from subjects | Suitable case definition | Validated measurement | Consistent mode of data collection | Suitable length of the shortest prevalence period | Right calculation of prevalence | Risk of bias |
| Meng et al., 2014 [45]  | No                                  | No                               | No                         | Yes                       | Yes                                   | Yes                      | Yes                   | Yes                                | Yes                                               | Yes                             | Moderate     |
| Wu et al., 2014 [46]    | No                                  | No                               | No                         | Yes                       | Yes                                   | Yes                      | Yes                   | Yes                                | Yes                                               | Yes                             | Moderate     |
| Zhang et al., 2014[47]  | No                                  | No                               | No                         | Yes                       | Yes                                   | Yes                      | Yes                   | Yes                                | Yes                                               | Yes                             | Moderate     |
| Meng et al., 2015 [35]  | No                                  | No                               | Yes                        | No                        | Yes                                   | Yes                      | No                    | Yes                                | Yes                                               | Yes                             | Moderate     |
| Wang et al., 2015 [48]  | No                                  | No                               | No                         | Yes                       | Yes                                   | Yes                      | No                    | Yes                                | Yes                                               | Yes                             | Moderate     |
| Wen et al., 2015 [36]   | No                                  | Yes                              | Yes                        | Yes                       | Yes                                   | Yes                      | Yes                   | Yes                                | Yes                                               | Yes                             | Low          |
| Chan et al., 2016 [19]  | No                                  | Yes                              | Yes                        | Yes                       | Yes                                   | Yes                      | Yes                   | Yes                                | Yes                                               | Yes                             | Low          |
| Han et al., 2016 [49]   | No                                  | No                               | No                         | Yes                       | Yes                                   | Yes                      | Yes                   | Yes                                | Yes                                               | Yes                             | Moderate     |
| Han et al., 2016 [50]   | No                                  | No                               | No                         | Yes                       | Yes                                   | Yes                      | Yes                   | Yes                                | Yes                                               | Yes                             | Moderate     |
| Huang et al., 2016 [20] | No                                  | Yes                              | Yes                        | Yes                       | Yes                                   | Yes                      | Yes                   | Yes                                | Yes                                               | Yes                             | Low          |
| Wang et al., 2016 [51]  | No                                  | No                               | No                         | Yes                       | Yes                                   | Yes                      | Yes                   | Yes                                | Yes                                               | Yes                             | Moderate     |
| Wang et al., 2016 [52]  | No                                  | No                               | No                         | Yes                       | Yes                                   | Yes                      | Yes                   | Yes                                | Yes                                               | Yes                             | Moderate     |
| Xia et al., 2016 [37]   | No                                  | No                               | Yes                        | Yes                       | Yes                                   | Yes                      | No                    | Yes                                | Yes                                               | Yes                             | Moderate     |
| Fang et al., 2017 [53]  | No                                  | No                               | No                         | Yes                       | Yes                                   | Yes                      | Yes                   | Yes                                | Yes                                               | Yes                             | Moderate     |
| Hai et al., 2017 [54]   | No                                  | No                               | No                         | Yes                       | Yes                                   | Yes                      | Yes                   | Yes                                | Yes                                               | Yes                             | Moderate     |
| Hua et al., 2017 [55]   | No                                  | No                               | No                         | Yes                       | Yes                                   | Yes                      | No                    | Yes                                | Yes                                               | Yes                             | Moderate     |
| Meng et al., 2017 [56]  | No                                  | No                               | No                         | Yes                       | Yes                                   | Yes                      | No                    | Yes                                | Yes                                               | Yes                             | Moderate     |



|                         |    |     |     |     |     |     |     |     |     |     |          |
|-------------------------|----|-----|-----|-----|-----|-----|-----|-----|-----|-----|----------|
| Wang et al., 2016 [75]  | No | No  | No  | Yes | Moderate |
| Fung et al., 2019 [42]  | No | Yes | Low      |
| Wang et al., 2019 [76]  | No | No  | No  | Yes | Yes | Yes | No  | Yes | Yes | Yes | Moderate |
| Hsu et al., 2014 [77]   | No | No  | No  | Yes | Moderate |
| Wu et al., 2017 [43]    | No | Yes | Yes | Yes | Yes | Yes | No  | Yes | Yes | Yes | Moderate |
| Liao 2018 [78]          | No | No  | No  | Yes | Moderate |
| Zeng et al., 2018 [79]  | No | No  | No  | Yes | Moderate |
| Yang et al., 2019 [80]  | No | No  | No  | Yes | Moderate |
| Chen 2018 [81]          | No | No  | No  | Yes | Moderate |
| Yang 2018 [44]          | No | Yes | Low      |
| Feng 2016 [82]          | No | No  | No  | Yes | Moderate |
| Ma 2017 [83]            | No | No  | No  | Yes | Moderate |
| Zhou et al., 2018 [84]  | No | No  | No  | Yes | Moderate |
| Zhang et al., 2019 [85] | No | No  | No  | Yes | Moderate |
| Yang 2019 [86]          | No | No  | No  | Yes | Yes | Yes | No  | Yes | Yes | Yes | Moderate |

Note: No=high risk; Yes=low risk.

Table S3 Univariable meta-regression for regions

| Areas                      | Male (n=43)    |                |         | Female (n=41)  |                |         |
|----------------------------|----------------|----------------|---------|----------------|----------------|---------|
|                            | exp( $\beta$ ) | 95% CI         | P value | exp( $\beta$ ) | 95% CI         | P value |
| North of mainland          | 1              |                |         | 1              |                |         |
| South and east of mainland | 0.70           | (0.398, 1.245) | 0.220   | 0.60           | (0.330, 1.092) | 0.092   |
| West of mainland           | 0.72           | (0.385, 1.337) | 0.287   | 0.70           | (0.365, 1.330) | 0.265   |
| Outside mainland           | <b>0.43</b>    | (0.207, 0.893) | 0.025   | <b>0.18</b>    | (0.079, 0.417) | <0.001  |

Table S4 Age and BMI reported in studies

| Studies | Age* | BMI* |
|---------|------|------|
|---------|------|------|

|                         | Total<br>(n=21) | male<br>(n=19) | Female<br>(n=20) | Total<br>(n=9) | male<br>(n=13) | Female<br>(n=14) |
|-------------------------|-----------------|----------------|------------------|----------------|----------------|------------------|
| <b>Community (n=32)</b> | —               | —              | —                | —              | —              | —                |
| Meng et al., 2014 [45]  | —               | —              | —                | 23.7           | —              | —                |
| Wu et al., 2014 [46]    | 76.0            | —              | —                | 24.6           | —              | —                |
| Zhang et al., 2014[47]  | 88.2            | —              | —                | 24.9           | —              | —                |
| Meng et al., 2015 [35]  | —               | 74.8           | 73.0             | —              | —              | —                |
| Wang et al., 2015 [48]  | —               | 75.6           | 76.9             | —              | 23.1           | 23.6             |
| Wen et al., 2015 [36]   | —               | 66.5           | 65.4             | —              | 23.4           | 23.1             |
| Chan et al., 2016 [19]  | —               | 72.4           | 72.6             | —              | 23.4           | 23.9             |
| Han et al., 2016 [49]   | 72.7            | 73.1           | 71.9             | 23.8           | 24.1           | 23.6             |
| Han et al., 2016 [50]   | 67.3            | 68.0           | 66.7             | —              | 25.2           | 25.4             |
| Huang et al., 2016 [20] | 73.4            | 74.1           | 72.6             | —              | —              | —                |
| Wang et al., 2016 [51]  | 68.7            | 69.1           | 68.5             | 23.9           | 23.7           | 24.0             |
| Wang et al., 2016 [52]  | —               | 69.9           | 68.8             | —              | 23.8           | 23.8             |
| Xia et al., 2016 [37]   | 68.7            | —              | —                | —              | —              | —                |
| Fang et al., 2017 [53]  | —               | —              | 69.9             | —              | —              | 23.5             |
| Hai et al., 2017 [54]   | 68.6            | 68.9           | 68.3             | —              | 23.9           | 24.1             |

|                                     |      |      |      |      |      |      |
|-------------------------------------|------|------|------|------|------|------|
| Hua 2017 et al., [55]               | —    | —    | —    | —    | —    | —    |
| Meng et al., 2017 [56]              | —    | —    | —    | —    | —    | —    |
| Chu 2018 [57]                       | 68.6 | —    | —    | 23.7 | —    | —    |
| Wang et al., 2018 [23]              | —    | —    | —    | —    | —    | —    |
| Yang et al., 2018 [58]              | 71.5 | 71.5 | 71.0 | —    | 24.1 | 24.2 |
| Zhang et al., 2018 [38]             | —    | —    | —    | —    | —    | —    |
| Chen et al., 2019 [21]              | 67.5 | —    | —    | —    | —    | —    |
| Du et al., 2019 [22]                | —    | —    | —    | —    | —    | —    |
| Liu et al., 2019 [39]               | —    | —    | —    | —    | —    | —    |
| Liu 2019 [59]                       | —    | —    | —    | —    | —    | —    |
| Wang et al., 2019 [60]              | 68.8 | 69.1 | 68.4 | —    | —    | —    |
| Xu et al., 2019 [40]                | —    | 68.6 | 68.1 | —    | 24.3 | 25.3 |
| Zhang et al., 2019 [61]             | —    | —    | 72.3 | —    | —    | —    |
| Liu et al., 2020 [15]               | —    | —    | —    | —    | —    | —    |
| Rong et al., 2020 [62]              | —    | —    | —    | —    | —    | —    |
| Xu et al., 2020 [63]                | 86.4 | —    | —    | —    | —    | —    |
| Yang et al., 2020 [64]              | 66.8 | 66.3 | 67.1 | 24.9 | 25.1 | 24.7 |
| <b>Hospitals (n=11)</b>             |      |      |      | —    |      |      |
| Wang et al., 2016 [52] <sup>†</sup> |      | 68.4 | 68.9 | —    | 24.4 | 24.1 |
| Cui 2018 [65]                       | 71.3 | —    | —    | —    | —    | —    |
| Zhai et al., 2018 [66]              | 84.2 | —    | —    | —    | —    | —    |
| Chen et al., 2019 [67]              | —    | —    | —    | —    | —    | —    |

|                                                               |      |      |      |      |      |      |
|---------------------------------------------------------------|------|------|------|------|------|------|
| Wang 2019 [41]                                                | —    | —    | —    | —    | —    | —    |
| Yao 2019 [68]                                                 | —    | —    | —    | —    | —    | —    |
| Yi et al., 2019 [69]                                          | —    | —    | —    | —    | —    | —    |
| Tan 2019 [70]                                                 | —    | —    | —    | —    | —    | —    |
| Zhang et al., 2019 [71]                                       | —    | —    | —    | 24.9 | —    | —    |
| Cui et al., 2020 [72]                                         | —    | —    | —    | —    | —    | —    |
| Wang et al., 2020 [73]                                        | —    | —    | —    | —    | —    | —    |
| <b>Outpatient services(n=4)</b>                               | —    | —    | —    | —    | —    | —    |
| Li et al., 2014 [74]                                          | —    | —    | —    | —    | —    | —    |
| Wang et al., 2016 [75]                                        | 77.6 | —    | —    | —    | —    | —    |
| Fung et al., 2019 [42]                                        | 68.3 | —    | —    | —    | —    | —    |
| Wang et al., 2019 [76]                                        | —    | —    | —    | —    | —    | —    |
| <b>Nursing home (n=5)</b>                                     | —    | —    | —    | —    | —    | —    |
| Hsu et al., 2014 [77]                                         | —    | 82.7 | —    | —    | —    | —    |
| Wu et al., 2017 [43]                                          | —    | 79.1 | 85.7 | —    | —    | —    |
| Liao 2018 [78]                                                | —    | 85.0 | 83.2 | —    | —    | —    |
| Zeng et al., 2018 [79]                                        | 81.6 | 80.7 | 82.0 | 24.2 | 24.2 | 24.1 |
| Yang et al., 2019 [80]                                        | —    | —    | —    | —    | —    | —    |
| <b>Mixed settings: communities and nursing homes (n=2)</b>    |      |      |      |      |      |      |
| Chen 2018 [81]                                                | —    | —    | —    | —    | —    | —    |
| Yang 2018 [44]                                                | —    | —    | —    | —    | —    | —    |
| <b>Mixed settings: hospital and outpatient services (n=5)</b> |      |      |      |      |      |      |
| Feng 2016 [82]                                                | —    | —    | —    | —    | —    | —    |
| Ma 2017 [83]                                                  | 74.0 | —    | —    | —    | —    | —    |
| Zhou et al., 2018 [84]                                        | 78.0 | —    | —    | —    | —    | —    |



|                         |   |   |   |   |   |   |
|-------------------------|---|---|---|---|---|---|
| Zhang et al., 2019 [85] | — | — | — | — | — | — |
| Yang 2019 [86]          | — | — | — | — | — | — |

\*: mean values

†: This study provided sarcopenia prevalence for older adults from communities and clinical settings, separately.

**Table S5 Univariable meta-regression for age**

| Variables      | Male (n=19)    |                |         | Female (n=20)  |                |         |
|----------------|----------------|----------------|---------|----------------|----------------|---------|
|                | Exp( $\beta$ ) | 95% CI         | P value | Exp( $\beta$ ) | 95% CI         | P value |
| <b>Age</b>     |                |                |         |                |                |         |
| 60-70 years    | 1              |                |         | 1              |                |         |
| 70-80 years    | 1.11           | (0.641, 1.910) | 0.700   | 0.65           | (0.270, 1.554) | 0.309   |
| 80 years above | <b>2.66</b>    | (1.284, 5.497) | 0.012   | <b>3.28</b>    | (1.089, 9.907) | 0.036   |
